# Supplementary material for: Insights into the sodium storage mechanism of Bi2Te3 nanosheets as superior anodes for sodium-ion batteries
Source: Royal Society of Chemistry journal article supplement (doi:10.1039/d1nr07960c), 2022-01-01
Supplement: d1nr07960c1.pdf [file d1nr07960c1.pdf]

## Supporting Information

### Insight on the Sodium Storage Mechanism of Bi<sub>2</sub>Te<sub>3</sub> Nanosheets as a Superior Anode for Sodium-ion Batteries

Simeng Pang<sup>a</sup>, Zhuang Hu<sup>a</sup>, Changling Fan<sup>a,c,d,\*</sup>, Weihua Zhang<sup>a,c</sup>, Yan Cai<sup>b</sup>, Shaochang Han<sup>a</sup>,  
Jinshui Liu<sup>a,c,\*</sup>, Jilei Liu<sup>a,c,d,\*</sup>

<sup>a</sup> College of Materials Science and Engineering, Hunan University, Changsha, 410082, China

<sup>b</sup> College of Life Science and Technology, Central South University of Forestry and Technology,  
Changsha, 410018, China

<sup>c</sup> Hunan Province Key Laboratory for Advanced Carbon Materials and Applied Technology, Hunan  
University, Changsha, Hunan, 410082, China

<sup>d</sup> Hunan Joint International Laboratory of Advanced Materials and Technology for Clean Energy,  
Hunan University, Changsha, Hunan, 410082, China

\*Corresponding author at: College of Materials Science and Engineering, Hunan University, Changsha,  
410082, China.

Tel.: +86 731 88822967; fax: +86 731 88822967.

E-mail address: fancl@hnu.edu.cn (Dr. C.L. Fan), jsliu@hnu.edu.cn (Prof. J.S. Liu),  
liujilei@hnu.edu.cn (Prof. J.L. Liu).

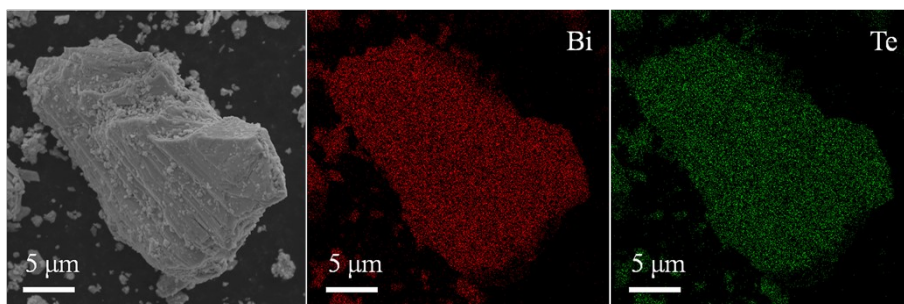

**Fig.S1** SEM image of the bulk  $\text{Bi}_2\text{Te}_3$  and the corresponding EDS maps for Bi and Te.

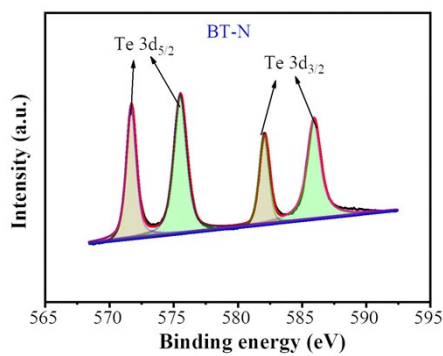

**Fig.S2** High-resolution XPS spectrum for the Te 3d in BT-N.

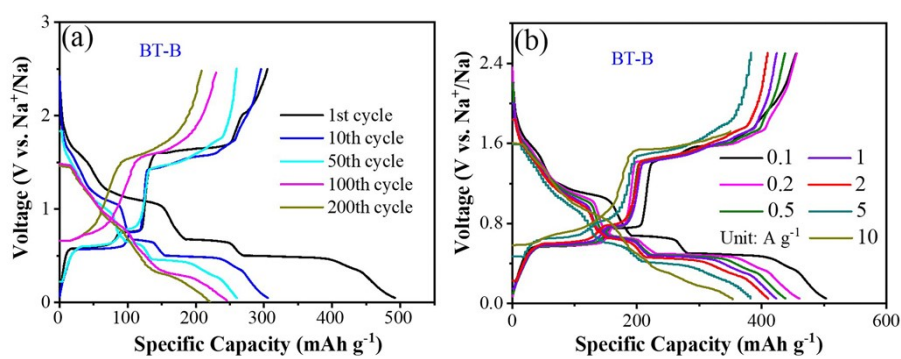

**Fig.S3** (a) Galvanostatic charge-discharge profiles of BT-B at current density of  $0.1 \text{ A g}^{-1}$ , (b) galvanostatic charge-discharge profiles of BT-B at different current densities.

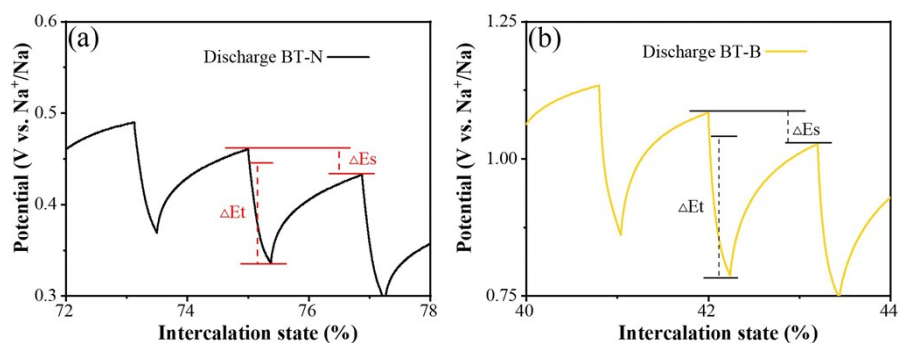

**Fig.S4** Partial magnification of the GITT curves of (a) BT-N and (b) BT-B.

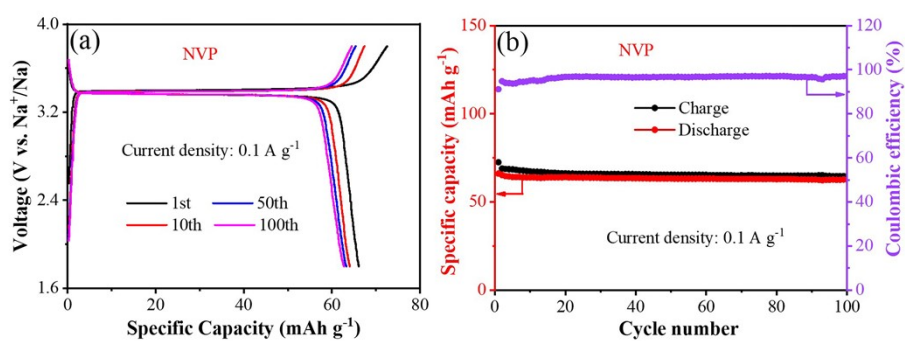

**Fig.S5** (a) Galvanostatic charge-discharge curves of  $\text{Na}_3\text{V}_2(\text{PO}_4)_3$  cathode at current density of  $0.1 \text{ A g}^{-1}$ , (b) cyclic performance of  $\text{Na}_3\text{V}_2(\text{PO}_4)_3$  cathode at current density of  $0.1 \text{ A g}^{-1}$ .

**Table S1.** Summary on synthesis methods and electrochemical performance of the bismuth-based as anode material for SIBs.

| Materials                                        | Synthetic method            | Cycle capacity [mAh g <sup>-1</sup> ] (cycles, I) | Rate capacity [mAh g <sup>-1</sup> ] C <sub>11</sub> , C <sub>12</sub> , C <sub>13</sub> (I <sub>1</sub> -I <sub>2</sub> -I <sub>3</sub> , A g <sup>-1</sup> ) | Ref.      |
|--------------------------------------------------|-----------------------------|---------------------------------------------------|----------------------------------------------------------------------------------------------------------------------------------------------------------------|-----------|
| Bi <sub>2</sub> Te <sub>3</sub>                  | Solution                    | 364 (1200, 5 A g <sup>-1</sup> )                  | 435.9, 411.7, 339.4 (0.1-0.5-10)                                                                                                                               | this work |
| Bi <sub>2</sub> Te <sub>3</sub> @PPy             | Solvothermal                | 165.3 (1000, 5 A g <sup>-1</sup> )                | 305, 223.2, 128.3 (0.1-0.5-10)                                                                                                                                 | [1]       |
| Bi <sub>2</sub> Te <sub>3</sub> @PPy             | Hydrothermal                | 406 (100, 0.1 A g <sup>-1</sup> )                 | 415, 337.6, 231.6 (0.1-0.5-5)                                                                                                                                  | [2]       |
| Bi <sub>2</sub> S <sub>3</sub> /Graphene         | Hydrothermal                | 348 (120, 1 A g <sup>-1</sup> )                   | 520, 420, 336 (0.1-0.5-2)                                                                                                                                      | [3]       |
| Bi <sub>2</sub> S <sub>3</sub> /MoS <sub>2</sub> | Solvothermal                | 323.4 (1200, 10 A g <sup>-1</sup> )               | 427.9, 370.8, 330.4 (0.2-0.5-5)                                                                                                                                | [4]       |
| Bi <sub>2</sub> Se <sub>3</sub> /graphene        | Ice-bath                    | 323.4 (1200, 10 A g <sup>-1</sup> )               | 229, 212, 181 (1-5-10)                                                                                                                                         | [5]       |
| Bismuthene nanosheets                            | Electrochemical exfoliation | 200 (2500, 20 A g <sup>-1</sup> )                 | 423, 356, 227 (2.5-5-15)                                                                                                                                       | [6]       |

## References

- (1) X. Liu, Y. Si, K. Li, Y. Xu, Z. Zhao, C. Li, Y. Fu and D. Li, Exploring sodium storage mechanism of topological insulator  $\text{Bi}_2\text{Te}_3$  nanosheets encapsulated in conductive polymer. *Energy Stor. Mater.* 2021, **41**, 255–263.
- (2) J. Cui, H. Zheng, Z. Zhang, S. Hwang, X.-Q. Yang and K. He, Origin of anomalous high-rate Na-ion electrochemistry in layered bismuth telluride anodes. *Matter* 2021, **4**, 1335–1351.
- (3) Y. Zhang, L. Fan, P. Wang, Y. Yin, X. Zhang, N. Zhang, K. Sun, Coupled flower-like  $\text{Bi}_2\text{S}_3$  and graphene aerogels for superior sodium storage performance. *Nanoscale* 2017, **9**, 17694–17698.
- (4) L. Cao, X. Liang, X. Ou, X. Yang, Y. Li, C. Yang, Z. Lin and M. Liu, Heterointerface Engineering of Hierarchical  $\text{Bi}_2\text{S}_3/\text{MoS}_2$  with Self-Generated Rich Phase Boundaries for Superior Sodium Storage Performance. *Adv. Funct. Mater.* 2020, **30**, 1910732.
- (5) D. Li, J. Zhou, X. Chen and H. Song, Graphene-Loaded  $\text{Bi}_2\text{Se}_3$ : A Conversion–Alloying-type Anode Material for Ultrafast Gravimetric and Volumetric Na Storage. *ACS Appl. Mater. Interfaces* 2018, **10**, 30379–30387.
- (6) M. Bo, J. Li, C. Yao, Z. Huang, L. Li, C. Q. Sun, C. Peng, Electronic structure of two-dimensional In and Bi metal on BN nanosheets. *RSC Adv.* 2019, **9**, 9342–9347.
